# Supplementary material for: Characterization of a Lineage C.36 SARS-CoV-2 Isolate with Reduced Susceptibility to Neutralization Circulating in Lombardy, Italy
Source: MDPI journal article supplement (doi:10.3390/v13081514), 2021-07-31
Supplement: s1 [file s1]

|             | Sublineage 1 | Sublineage 2 | Sublineage 3 |
|-------------|--------------|--------------|--------------|
| Australia   | 0            | 4.6          | 0            |
| Canada      | 0            | 5            | 0            |
| Denmark     | 0            | 6.2          | 0            |
| Egypt       | 26.2         | 26.1         | 0            |
| England     | 22.4         | 17           | 29.7         |
| Germany     | 18.6         | 7.1          | 10.1         |
| Italy       | 2.9          | 0            | 10.1         |
| Lithuania   | 2.9          | 0            | 0            |
| Switzerland | 4.8          | 4.6          | 7.6          |
| UAE         | 0            | 5            | 0            |
| USA         | 4.3          | 11.6         | 28.5         |
| Others      | 18.1         | 12.9         | 13.9         |

Table S1: Geographic distribution of the three C.36 sublineages expressed as the percentage of sequenced isolated by country over the total worldwide.

| Serum # | Gender | Age | Anti-RBD<br>(U/mL) | Anti-S1/S2 (AU/mL) |      |
|---------|--------|-----|--------------------|--------------------|------|
|         |        |     |                    | IgG                | IgM  |
| 1       | M      | 27  | > 2500             | 363                | 0.17 |
| 2       | F      | 53  | > 2500             | > 400              | 0.17 |
| 3       | F      | 59  | > 2500             | > 400              | 3.11 |
| 4       | F      | 40  | > 2500             | > 400              | 0.54 |
| 5       | M      | 52  | > 2500             | > 400              | 6.57 |
| 6       | F      | 59  | > 2500             | 202                | 1.43 |
| 7       | F      | 64  | > 2500             | > 400              | 4.18 |
| 8       | F      | 25  | > 2500             | 322                | 0.67 |
| 9       | F      | 58  | 1715               | 208                | 0.85 |
| 10      | M      | 62  | 1467               | 248                | 1.42 |
| 11      | M      | 65  | 1427               | 196                | 0.64 |
| 12      | M      | 36  | 1357               | 211                | 0.39 |
| 13      | M      | 57  | 1326               | 198                | 0.68 |
| 14      | M      | 48  | 893                | 127                | 0.49 |
| 15      | F      | 50  | 829                | 123                | 0.19 |
| 16      | F      | 56  | 701                | 149                | 0.07 |
| 17      | M      | 44  | 671                | 178                | 0.38 |
| 18      | M      | 57  | 639                | 173                | 0.38 |
| 19      | F      | 64  | 567                | 231                | 0.37 |
| 20      | M      | 54  | 386                | 204                | 0.44 |

Table S2: gender, age, anti-RBD titer and anti-S1/S2 titer of tested sera, colored according to the anti-RBD titer (blue, light blue and grey for titer >2500 U/mL, 2500 - 1000 U/mL or <1000 U/mL, respectively).
